# Supplementary material for: Assessment of racial differences in the incidence of thrombocytopenia induced by trastuzumab emtansine: a systematic review and meta-analysis
Source: PubMed Central journal article supplement — Ann Transl Med. 2021 Jul;9(14):1139. doi: 10.21037/atm-21-2763 (PMC8350666; doi:10.21037/atm-21-2763), 2021-07
Supplement: atm-09-14-1139-supplementary.pdf [file atm-09-14-1139-supplementary.pdf]

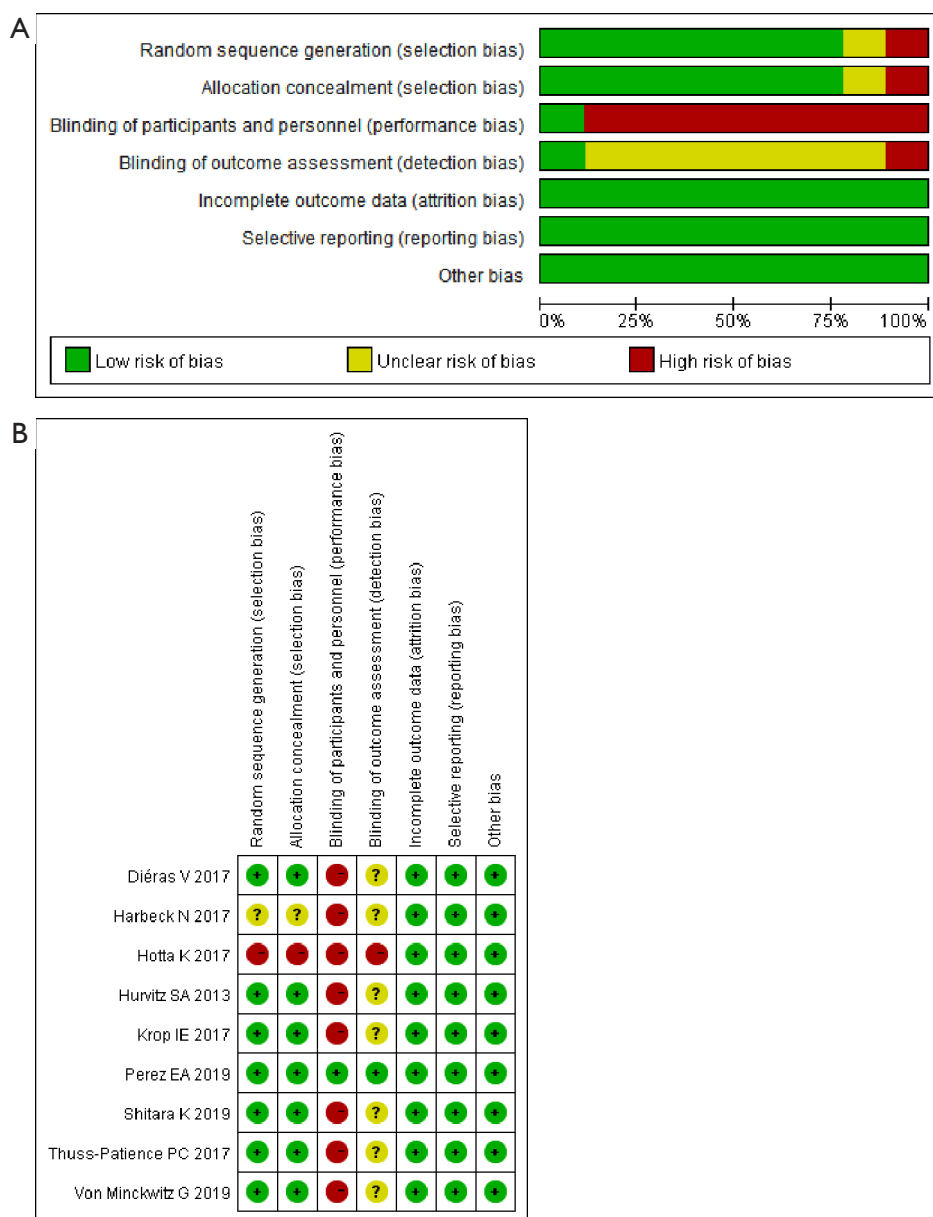

**Figure S1** Quality assessment of randomized controlled trials by the Cochrane risk bias assessment tool. (A) Each risk of bias item presented as percentages across all included studies. (B) Each risk of bias item for each included study.

**Table S1** Methodological index for non-randomized studies

|                   | Clearly stated aim | Inclusion of consecutive patients | Prospective collection of data | Endpoint appropriate to the aim of the study | Unbiased assessment of the study endpoint | Follow up period appropriate to the aim of the study | Loss of follow up less than 5% | Prospective calculation of the study size | Total |
|-------------------|--------------------|-----------------------------------|--------------------------------|----------------------------------------------|-------------------------------------------|------------------------------------------------------|--------------------------------|-------------------------------------------|-------|
| Beeram M 2012     | 2                  | 0                                 | 2                              | 2                                            | 0                                         | 2                                                    | 2                              | 0                                         | 10    |
| Krop IE 2010      | 2                  | 0                                 | 2                              | 2                                            | 0                                         | 2                                                    | 2                              | 0                                         | 10    |
| Yamamoto H 2015   | 2                  | 0                                 | 0                              | 2                                            | 0                                         | 2                                                    | 2                              | 0                                         | 8     |
| Yardley DA 2015   | 2                  | 2                                 | 0                              | 2                                            | 2                                         | 2                                                    | 2                              | 1                                         | 13    |
| Li BT 2018        | 2                  | 1                                 | 2                              | 2                                            | 2                                         | 2                                                    | 2                              | 1                                         | 14    |
| Jhaveri KL 2019   | 2                  | 1                                 | 1                              | 2                                            | 1                                         | 2                                                    | 2                              | 1                                         | 12    |
| Gupta M 2013      | 2                  | 1                                 | 2                              | 2                                            | 1                                         | 2                                                    | 2                              | 0                                         | 12    |
| Kashiwaba M 2016  | 2                  | 1                                 | 2                              | 2                                            | 2                                         | 2                                                    | 2                              | 0                                         | 13    |
| Krop IE 2012      | 2                  | 1                                 | 2                              | 2                                            | 2                                         | 2                                                    | 2                              | 1                                         | 14    |
| Watanabe J 2017   | 2                  | 2                                 | 1                              | 1                                            | 2                                         | 2                                                    | 2                              | 0                                         | 12    |
| Peters S 2018     | 2                  | 1                                 | 2                              | 2                                            | 1                                         | 2                                                    | 2                              | 1                                         | 13    |
| Burris HA 2011    | 2                  | 1                                 | 2                              | 2                                            | 2                                         | 2                                                    | 2                              | 1                                         | 14    |
| Montemurro F 2019 | 2                  | 1                                 | 2                              | 2                                            | 2                                         | 2                                                    | 2                              | 2                                         | 15    |

**Table S2** Joanna Briggs Institute Critical Appraisal tool for observational studies

|                     | Were the criteria for inclusion in the sample clearly defined? | Were the study subjects and the setting described in detail? | Was the exposure measured in a valid and reliable way? | Were objective, standard criteria used for measurement of the condition? | Were confounding factors identified? | Were strategies to deal with confounding factors stated? | Were the outcomes measured in a valid and reliable way? | Was appropriate statistical analysis used? | Total |
|---------------------|----------------------------------------------------------------|--------------------------------------------------------------|--------------------------------------------------------|--------------------------------------------------------------------------|--------------------------------------|----------------------------------------------------------|---------------------------------------------------------|--------------------------------------------|-------|
| Bartsch R 2015      | 2                                                              | 2                                                            | 2                                                      | 2                                                                        | 1                                    | 0                                                        | 2                                                       | 2                                          | 13    |
| Fabi A 2017         | 2                                                              | 2                                                            | 1                                                      | 2                                                                        | 0                                    | 0                                                        | 2                                                       | 2                                          | 11    |
| Hardy-Werbin M 2019 | 1                                                              | 0                                                            | 1                                                      | 2                                                                        | 0                                    | 0                                                        | 2                                                       | 2                                          | 8     |
| Jacot W 2016        | 2                                                              | 2                                                            | 2                                                      | 2                                                                        | 0                                    | 0                                                        | 2                                                       | 2                                          | 12    |
| Michel LL 2015      | 0                                                              | 0                                                            | 2                                                      | 1                                                                        | 0                                    | 0                                                        | 2                                                       | 2                                          | 7     |
| Yeo W 2018          | 2                                                              | 2                                                            | 2                                                      | 2                                                                        | 1                                    | 0                                                        | 2                                                       | 2                                          | 13    |
| Vici P 2017         | 1                                                              | 1                                                            | 0                                                      | 2                                                                        | 0                                    | 0                                                        | 2                                                       | 2                                          | 8     |

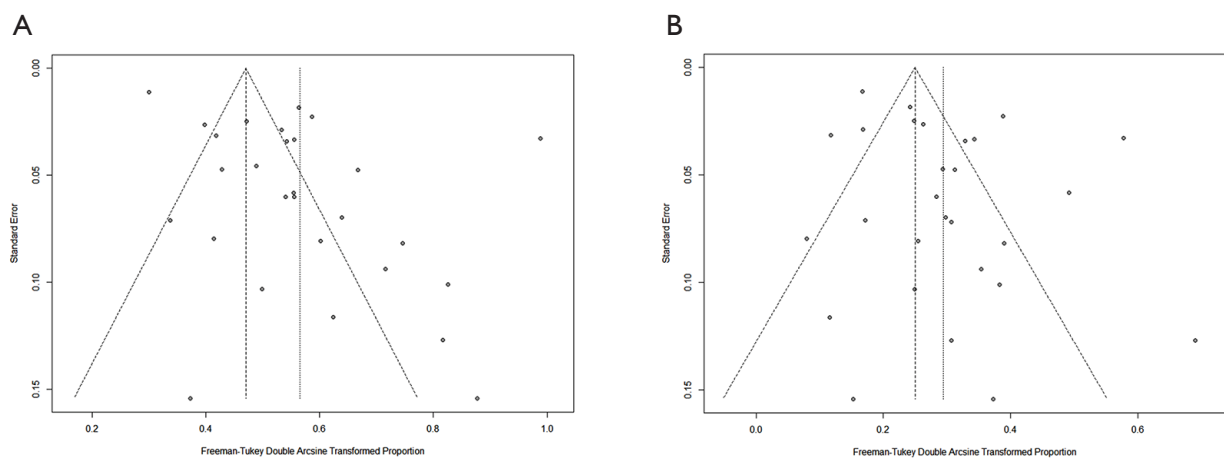

**Figure S2** Funnel plots for the evaluation of the publication bias. (A) Publication bias in the incidence of all-grade thrombocytopenia. (B) Publication bias in the incidence of grade  $\geq 3$  thrombocytopenia.
